# Supplementary material for: A sulfobetaine zwitterionic polymer–drug conjugate for multivalent paclitaxel and gemcitabine co-delivery
Source: Royal Society of Chemistry journal article supplement (doi:10.1039/d1bm00393c), 2021-01-01
Supplement: d1bm00393c1.pdf [file d1bm00393c1.pdf]

**Supplementary Material**

**A Sulfobetaine Zwitterionic Polymer-Drug Conjugate  
for Multivalent Paclitaxel and Gemcitabine Co-Delivery**

Haotian Sun,<sup>‡a</sup> Lingyue Yan,<sup>‡b</sup> Runsheng Zhang,<sup>a</sup> Jonathan F. Lovell,<sup>b</sup> Yun Wu,<sup>\*b</sup> and  
Chong Cheng<sup>\*a</sup>

<sup>1</sup> Department of Chemical and Biological Engineering, University at Buffalo, The  
State University of New York, Buffalo, NY

<sup>2</sup> Department of Biomedical Engineering, University at Buffalo, The State University  
of New York, Buffalo, NY

<sup>‡</sup> These authors contributed equally.

\* Corresponding authors. E-mail addresses: ccheng8@buffalo.edu (C. Cheng);

ywu32@buffalo.edu (Y. Wu)

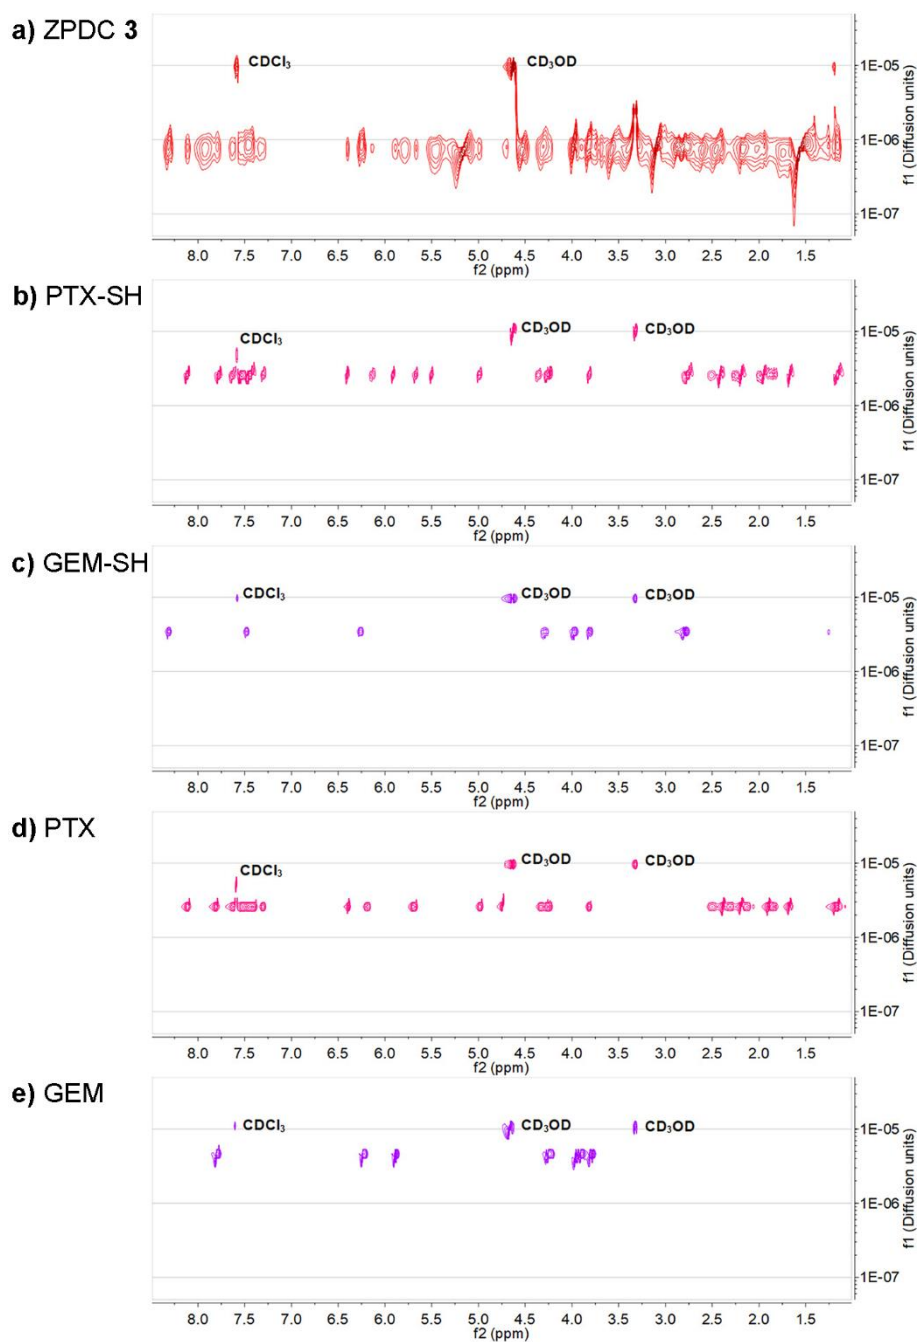

**Fig. S1** DOSY NMR spectra of a) ZPDC **3**, b) PTX-SH, c) GEM-SH, d) PTX, e) GEM in  $CDCl_3/CD_3OD$  (v/v, 1:1).

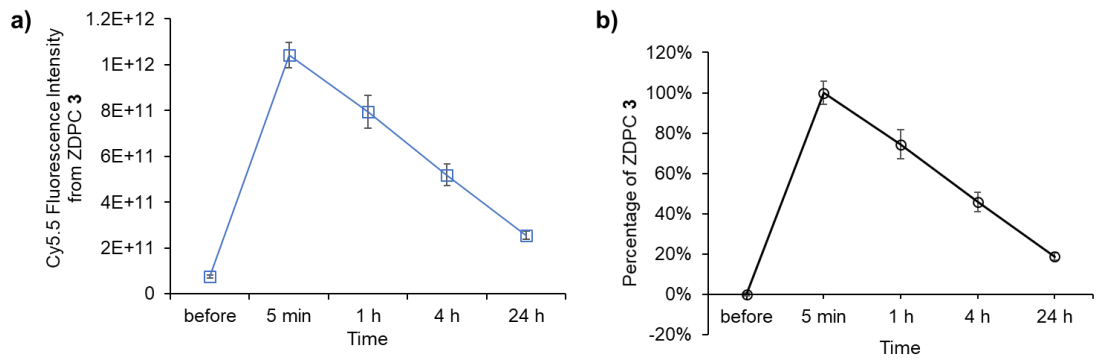

**Fig. S2** a) The whole body Cy5.5 fluorescence intensity of ZPDC 3, and b) the derived percentage of ZPDC 3 circulating in the mice at 5 min (as 100%), 1 h, 4 h, and 24 h post injection.

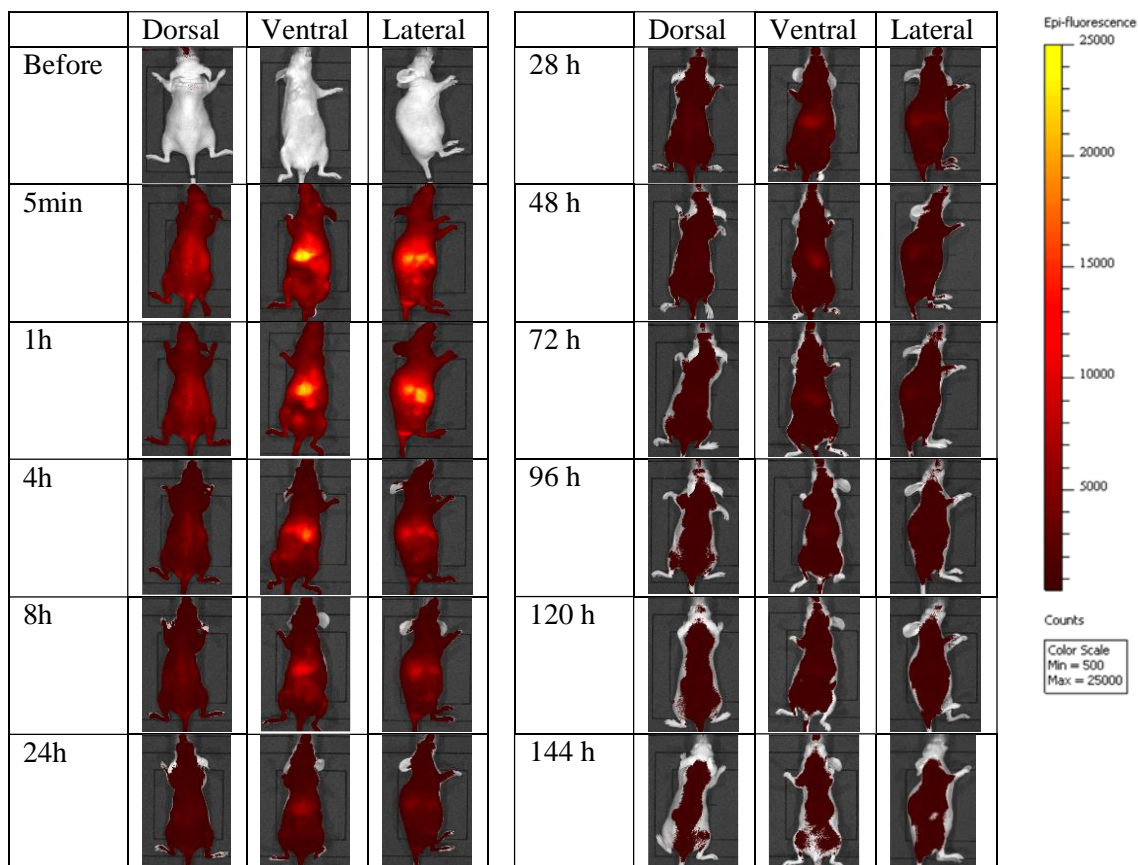

**Fig. S3** Representative whole body fluorescence images of healthy female nude mice (of dorsal, ventral, and lateral sides) at different time points post intravenous injection of Cy5.5-labelled ZP 2 at Cy5.5 dose of 1.5 mg/kg body weight.

**Table S1.** Blood panel analysis at the end of the *in vivo* study <sup>a,b</sup>

|                         | PBS         | ZP 2         | PTX+GEM      | ZPDC 3       |
|-------------------------|-------------|--------------|--------------|--------------|
| BUN (mg/dl)             | 18.5±4.98   | 23.51±4.56   | 17.96±2.53   | 18.77±2.91   |
| Creatinine (mg/dl)      | ≤0.2        | ≤0.3         | ≤0.2         | ≤0.2         |
| Phosphorus (mg/dl)      | 9.53±1.43   | 8.75±1.82    | 9.79±1.03    | 10.07±2.11   |
| Calcium (mg/dl)         | 9.92±0.68   | 9.06±0.34*   | 9.31±0.72    | 9.41±0.37    |
| Total Protein (g/dl)    | 5.1±0.39    | 5.19±0.24    | 5.36±0.59    | 5.29±0.28    |
| Albumin (g/dl)          | 2.44±0.15   | 2.55±0.21    | 2.61±0.46    | 2.56±0.24    |
| Globulin (g/dl)         | 2.66±0.26   | 2.64±0.09    | 2.74±0.21    | 2.73±0.10    |
| Glucose (mg/dl)         | 110.8±52.74 | 123.63±23.37 | 137.22±56.55 | 131.71±48.17 |
| Cholesterol (mg/dl)     | 107.4±10.45 | 93.13±10.49* | 103.44±15.34 | 91.14±13.33* |
| ALT (GPT) (U/l)         | 22.4±6.35   | 20±4.11      | 24±6.69      | 27.71±5.68   |
| ALP (U/l)               | 66.6±16.46  | 57.5±8.28    | 65.44±10.61  | 70.85±7.78   |
| GGT (U/l)               | <10         | <10          | <10          | <10          |
| Total Bilirubin (mg/dl) | 0.62±0.30   | 0.83±0.46    | 1±1.17       | 0.74±0.32    |

<sup>a</sup> In the *in vivo* study, PBS control, ZP 2, PTX+GEM, and ZPDC 3 were administrated intravenously at PTX does of 10 mg/kg body weight and GEM does of 24 mg/kg body weight (for PTX+GEM and ZPDC 3) every 3 days with a total of 6 injections.

<sup>b</sup> \**p* < 0.05, versus PBS treated group.
